# Supplementary material
Source: PubMed Central journal article supplement (PMC5837866)
Supplement: NIHMS944804-supplement-Supplemental_Figure.pdf [file NIHMS944804-supplement-Supplemental_Figure.pdf]

# Supplementary Figure 1

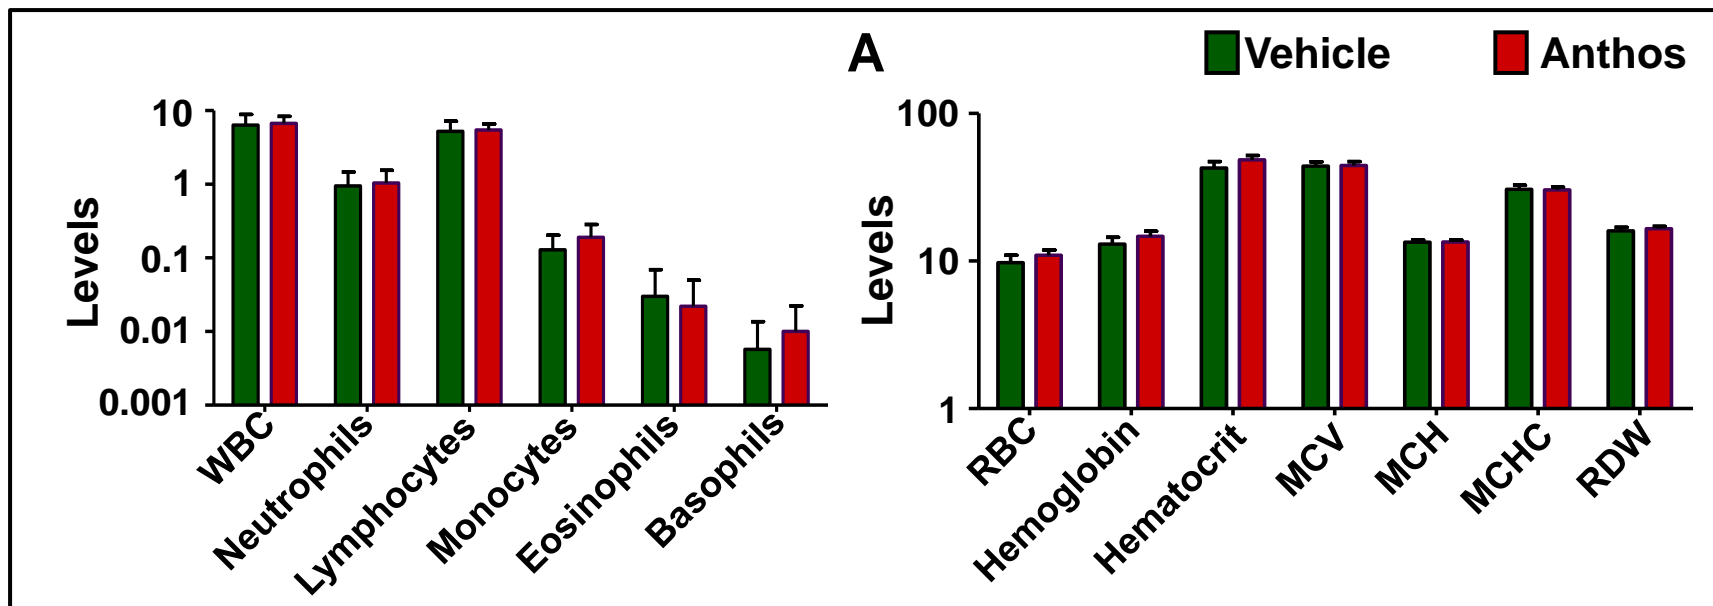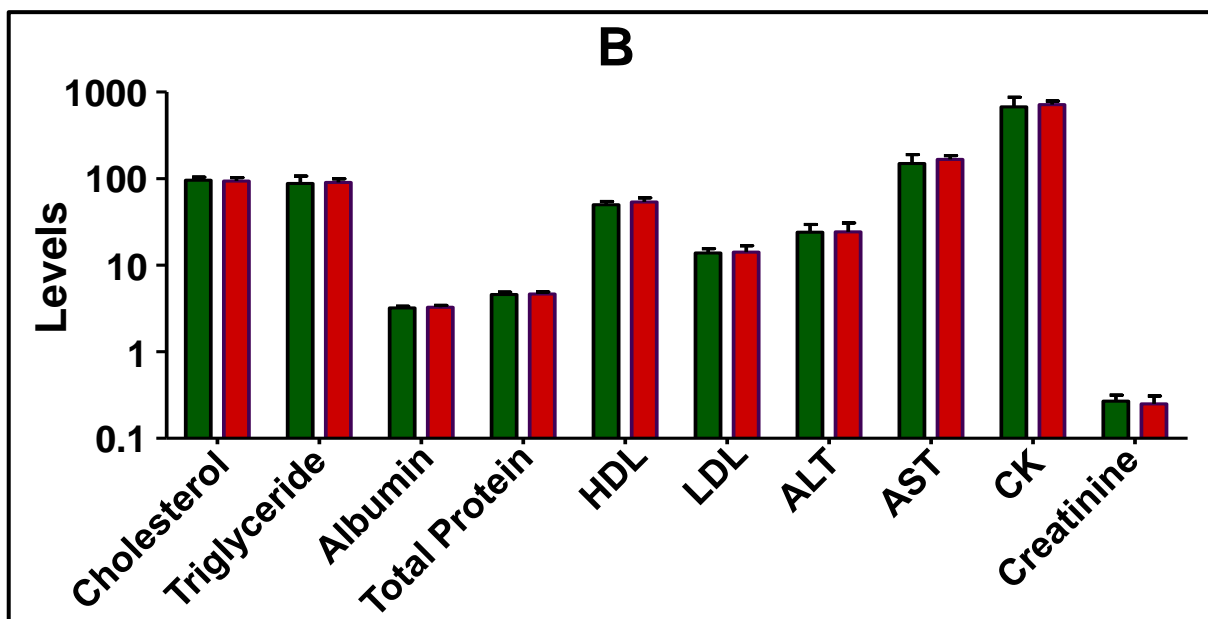

Supplementary Fig. 1. **Systemic toxicity of Anthos:** [Wild-type](#) female [C57BL/6](#) mice (5–6 week old) were randomized into two groups and treated daily with the vehicle (PBS) (n = 4) or Anthos (8 mg/kg b. wt.) (n = 7) by oral gavage daily, 5 times a week for 5 weeks. Blood was analyzed for [hematological](#) parameters (A) and biochemical parameters (B). Data represent average  $\pm$  SE of means. Statistical analysis performed using Student t-test revealed insignificant difference between Anthos-vs vehicle-treated mice.
